# Supplementary material for: Tailor-made spider-eggcase-silk spheres for efficient lysosomal drug delivery
Source: PubMed Central journal article supplement (PMC9078666; doi:10.1039/c8ra00232k), 2018-03-06
Supplement: RA-008-C8RA00232K-s001.pdf [file RA-008-C8RA00232K-s001.pdf]

## Supplementary information

### Tailor-Made Spider-Eggcase-Silk Spheres for Efficient Lysosomal Drug Delivery

*Jianming Chen,<sup>a</sup> Jinlian Hu,<sup>\*a</sup> Peijun Zuo,<sup>b</sup> Xiaoqian Su,<sup>c</sup> Zhigao Liu,<sup>d</sup> and Mo Yang<sup>e</sup>*

<sup>a</sup>Institute of Textiles and Clothing, The Hong Kong Polytechnic University, Hung Hom, Kowloon, Hong Kong, China

Email: jin-lian.hu@polyu.edu.hk.

<sup>b</sup>Nano and Advanced Materials Institute, The Hong Kong University of Science and Technology Clear Water Bay, Kowloon, Hong Kong, China

<sup>c</sup>School of Chemical and Biomedical Engineering, Nanyang Technological University, Singapore.

<sup>d</sup>Shenzhen PKU-HKUST Medical Center, Shenzhen, Guangdong, China.

<sup>e</sup>Department of Biomedical Engineering, The Hong Kong Polytechnic University, Hung Hom, Kowloon, Hong Kong, China

**A**

```

401 CAGTGCCAAG CTTGCAIGCC TGCAGGTCGA CTCIAGAGGA TCCCAGGTA CCGAGCTCGA ATTCGTAATC ATGGTCATCG CGGCCCGCATG ATGATGATGA
GTCACGGTTC GAACGTACGG ACCTCCAGCT GAGATCTCCT AGGGGCCCAT GGCTCGAGCT TAAGCATTAG TACCAGTAGC GCGCCCGTAC TACTACTACT
501 TGATGCGCGC TGCTGCTGCT GCTCGCGCTC TGGCTGGCAT CTTGGCTCGC CGCTGGCTG TGTTGGTGGT TGGTGTGGT GCTGCTGCTG CCCGCCITCG
ACTACCGCGC ACGACGACGA CGAGCGCGAG ACCGAGCGTA GGACCGAGCG GCGGACCGAC CACCACCACC ACCACGACCA CGACGACGAC GGGCGGACCG
601 CCGCGCTCTG GCTCGCGCTG CCGCTCGCGC CTTGGCTAAA CGCTGGCGCC GCGCGCTGGC TCTGCGCAAA CGCGCTGCTC TGGCTCGCGC TGCCCGCTTG
GGCGCGAGAC CGAGCGCGAC GCGGAGCGGC GGACCGAATT GCGGACCGCG GCGCGGACCG AGACCGGTTT GCGGAGCGAG ACCGAGCGCG AGCGCGGAC
701 CGCCGCCACG CTGCTCGCGC CGCTGCTAAT CGCGCTGCTC AGCTGCTCG CCAAGCCCGC CGCTTTTTC TGGTTCAGAA TGCCCTGGCC GCCACGACG
CGCGCGTTCG GACGAGCGCG GCGACGATTA GCGCGACGAG TCGACAGAGC GGTCCGGCGG GCGCAAAAG ACCCAGCTTT ACCGAGCGCG GCGCTGCTCG
801 TGGCCAAACG CGTGTCTCAC CGCGTTCGCA TACTGAAACG GGCTCGCGCC CAGGCCACG GTGCGCACCG CTTGGCTCAC CGCATCCGCA AAGCGCGCG
ACCGGTTTTC GCAACGAGTG GCGCAAGCGT ATGACTTTTC CGAGCGCGGG GTGCGGGTGC CACGCGTGGC GGACCGAGTG GCGTAGGGGT TTGCGCGCG
901 CGTITGCTAAI GCCCAGGGTC TGCGCCCGCT TCAGGCCAAI CTGATAGCCC ACCTGGCCCA CCGCGCTCGC GCTGCTCGCG CTGCTAAACA TAGCTGTTTC
GCAACGATTA CCGGCTCCAG ACGCGGCGCA AGTCCGGTTA GACTATCGGG TGGACCGGGT GCGCGGAGCG CGACGAGCGC GACGATTTGT ATCGACAAAG
1001 CTGTGTGAAA TTGTTATCCG CTCACAAITC CACACACAT ACGAGCCGGA AGCATAAAGT GTAAAGCCTG GGGTGCCTAA TGAGTGAAGT AACTCACAIT
GACACACTTT AACAAATAGG GAGTGTAAAG GTGTGTTGTA TGCTCGGCGT TCGTATTICA CAITTCGGAC CCCACGGATT ACTACTCGA TTGAGTGTA

```

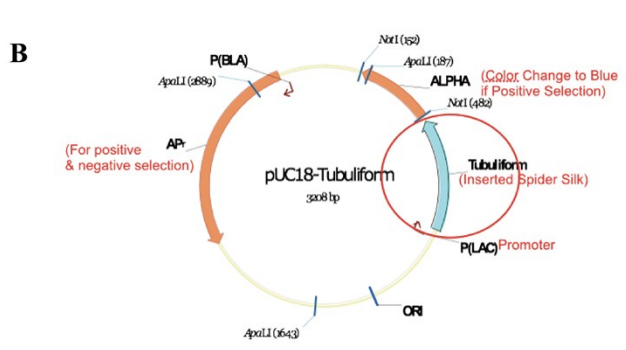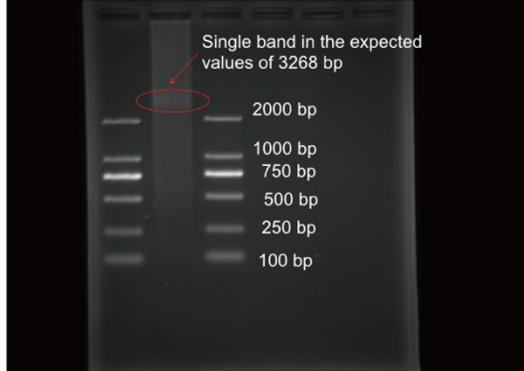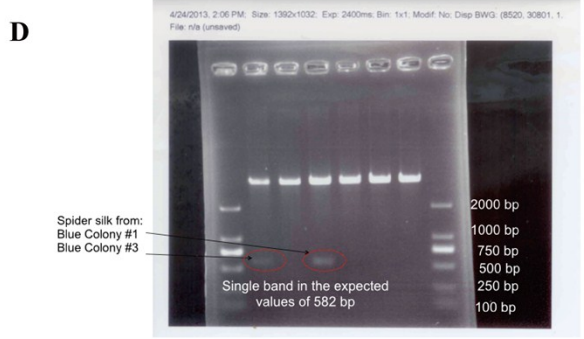

**E**

```

PS26FP -----FSSASSTSAVGQMGVYGLNAAQLTGLISNAPAFADAVSQAVRTVGVGASFPQYAN 55
Tubuliform QETAMPFSSASSASAVGQVGYGLNAAQLTGLISNAPAFADAVSQAVRTVGVGASFPQYAN 60
*****

PS26FP AVSNAFGQLGGQGLLTQENAAGLASSVSSAISAASSVAAQASASQSSAFAQSQAAAAQ 115
Tubuliform AVSNAFGQLGGQGLLTQENAAGLASSVSSAISAASSVAAQASASQSSAFAQSQAAAAQ 120
*****

His-tag Label for Future Protein Purification
PS26FP AFSQTAASRSASQAAAGSSSTSTTTTTQAASQDASQASSSSSAAPHHHHHAAMTMIT 175
Tubuliform AFSQAAASRSASQAAAGSSSTSTTTTTQAASQDASQASSSSSA----- 166
*****

```

**Figure S1.** Gene recombinant of spider eggcase silk proteins. A, complete gene sequence; B, plasmid design; C, verification of targeted plasmid; D, verification of tubuliform spidroins; E, Similarity comparison between the wild type and engineered one.

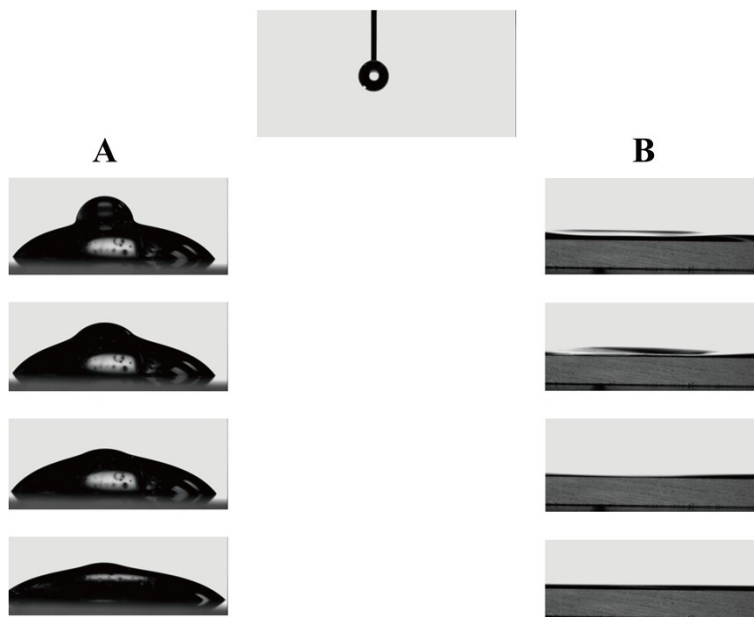

**Figure S2.** Preparation process in different lubricant substrates. A) High- molecule-weight silicon oil; B) Low-molecule-weight silicon oil.

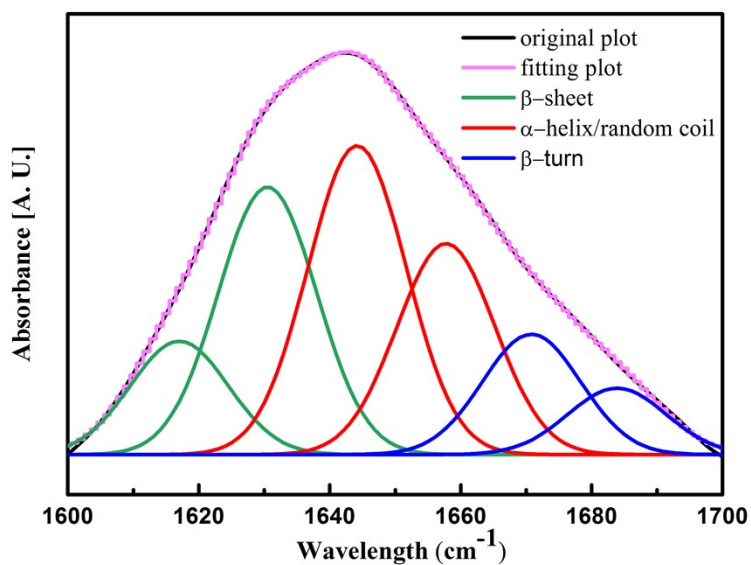

**Figure S3.** Selected ATR-FTIR spectra of original silk spheres deduced after Fourier self-deconvolution. Within amide I band, the contributions of  $\beta$ -sheets, random coil/  $\alpha$ -helix and  $\beta$ -turn are represented.

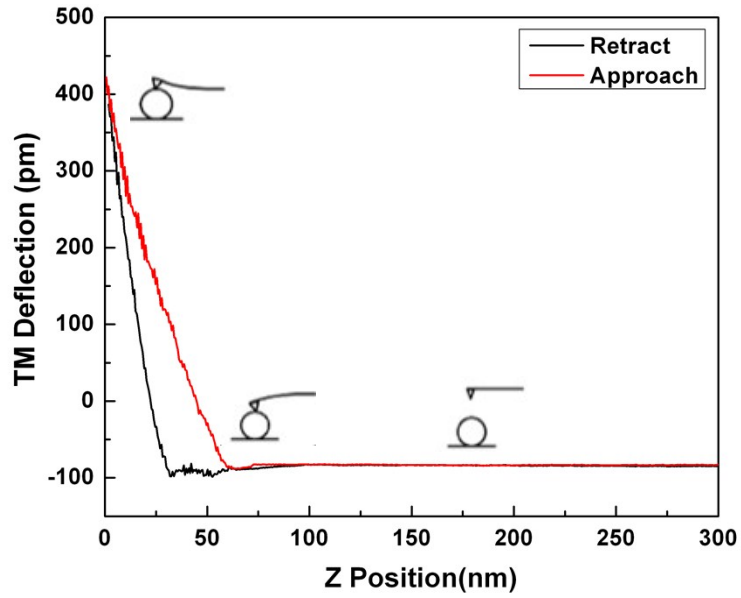

**Figure S4.** Nanoindentation curve of a single silk sphere.

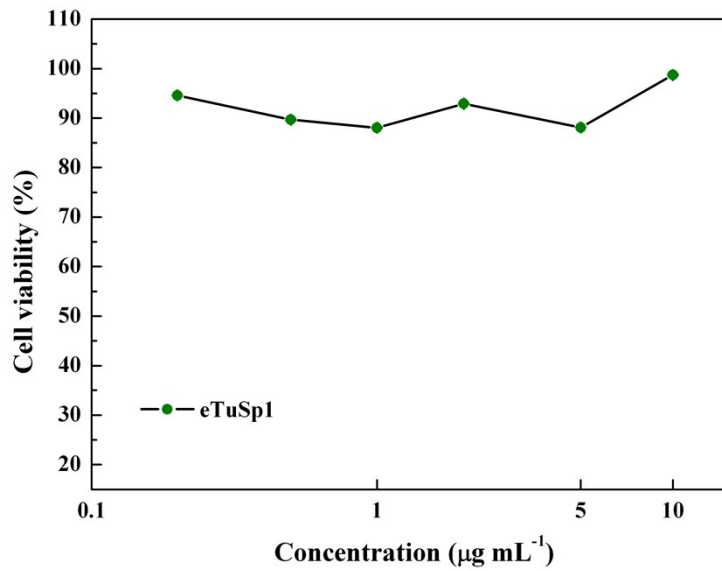

**Figure S5.** Cytotoxicity of pure eTuSp1 spheres.

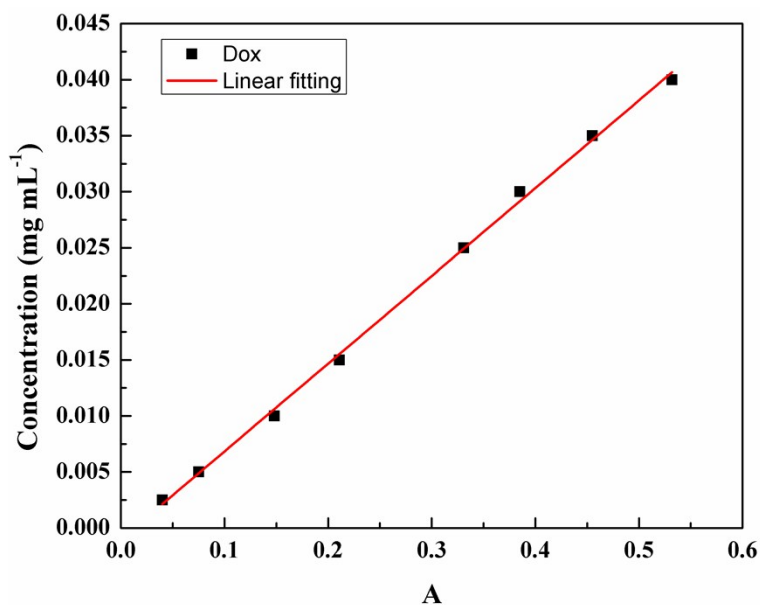

**Figure S6.** The standard concentration plot of the Dox. The absorbance of each sample is measured at the wavelength of 490 nm by UV-Vis spectrometry.

**Table S1.** Physicochemical properties of eTuSp1 spheres.

|        | Size (nm) | Polydispersity index | Zeta potential (mV) | Mobility (cm <sup>2</sup> /Vs ± SD)          |
|--------|-----------|----------------------|---------------------|----------------------------------------------|
| eTuSp1 | 183       | 0.214                | -33.5 ± 4.2         | -2.48×10 <sup>4</sup> ± 2.14×10 <sup>5</sup> |
